# Supplementary material for: Wide-Field Choroidal Thickness Analysis after Half-Fluence Photodynamic Therapy Combined with Intravitreal Aflibercept Injection in Pachychoroid Neovasculopathy
Source: MDPI journal article supplement (doi:10.3390/jcm13061608), 2024-03-11
Supplement: s1 [file s1]

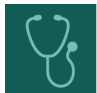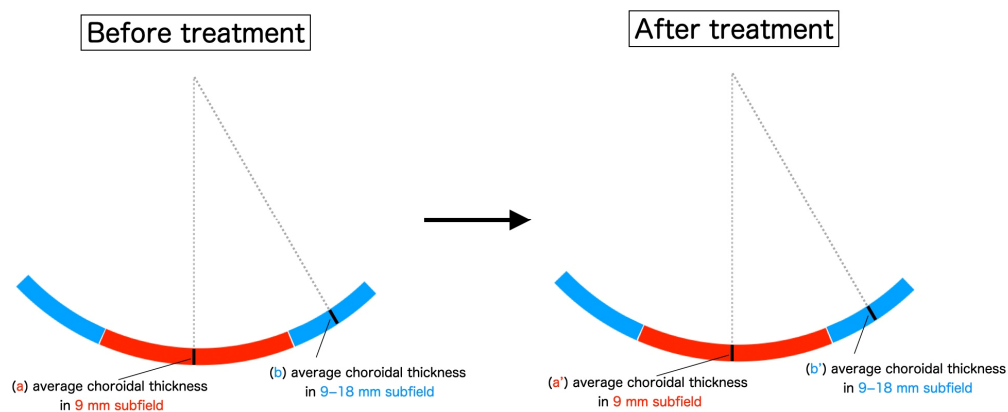

The change ratio of choroidal thickness in 9 mm subfield :  $\frac{a'}{a}$

The change ratio of choroidal thickness in 9–18 mm subfield :  $\frac{b'}{b}$

**Figure S1.** Comparison of the ratio of change in choroidal thickness between subfields.
